# Supplementary material for: Gymnodinium catenatum Paralytic Shellfish Toxin Production and Photobiological Responses under Marine Heat Waves
Source: MDPI journal article supplement (doi:10.3390/toxins15020157), 2023-02-14

## Supplementary Materials

**Supplemental Table S1.** Results from post-hoc comparisons between treatments, sampling date and marine heatwave stage (function “emmeans”). C – control, I – marine heatwave category I, IV – marine heatwave category IV, fM – concentration in fM per cell, MF – molar fraction (%).

| Contrasts            | Odds<br>ratio/Estimate | Standard<br>error | z-ratio | P-value          |
|----------------------|------------------------|-------------------|---------|------------------|
| Cell concentration   |                        |                   |         |                  |
| C-I                  | 0.981                  | 0.030             | -0.633  | 0.8020           |
| C-IV                 | 0.986                  | 0.030             | -0.462  | 0.8891           |
| I-IV                 | 1.005                  | 0.031             | 0.158   | 0.9863           |
| Beginning – Peak     | 0.412                  | 0.013             | -27.51  | <b>&lt;.0001</b> |
| Beginning – Recovery | 0.466                  | 0.015             | -23.19  | <b>&lt;.0001</b> |
| Peak - Recovery      | 1.132                  | 0.029             | 4.89    | <b>&lt;.0001</b> |
| Chain formation      |                        |                   |         |                  |
| C-I                  | 1.15                   | 0.081             | 2.06    | <b>0.0989</b>    |
| C-IV                 | 2.76                   | 0.189             | 14.76   | <b>&lt;.0001</b> |
| I-IV                 | 2.39                   | 0.160             | 13.03   | <b>&lt;.0001</b> |
| Beginning – Peak     | 0.42                   | 0.030             | -12.23  | <b>&lt;.0001</b> |
| Beginning – Recovery | 0.52                   | 0.037             | -9.11   | <b>&lt;.0001</b> |
| Peak - Recovery      | 1.26                   | 0.077             | 3.76    | <b>0.0005</b>    |
| Cell length          |                        |                   |         |                  |
| Beginning – Peak     | 0.0021                 | 0.000538          | 3.90    | <b>0.0003</b>    |
| Beginning – Recovery | -0.0022                | 0.000538          | -4.17   | <b>&lt;.0001</b> |
| Peak - Recovery      | -0.0043                | 0.000538          | -8.07   | <b>&lt;.0001</b> |
| Fv/Fm                |                        |                   |         |                  |
| Beginning – Peak     | -0.079                 | 0.016             | -4.96   | <b>&lt;.0001</b> |
| Beginning – Recovery | -0.065                 | 0.015             | -4.40   | <b>&lt;.0001</b> |
| Peak - Recovery      | 0.013                  | 0.016             | 0.87    | 0.6609           |
| PSP toxicity         |                        |                   |         |                  |
| C-I                  | 6.98                   | 2.4               | 2.905   | <b>0.0103</b>    |
| C-IV                 | 5.93                   | 2.4               | 2.468   | <b>0.0362</b>    |
| I-IV                 | -1.05                  | 2.4               | -0.437  | 0.9000           |
| Beginning – Peak     | 4.54                   | 2.4               | 1.890   | 0.1417           |
| Beginning – Recovery | 9.67                   | 2.4               | 4.025   | <b>0.0002</b>    |
| Peak - Recovery      | 5.13                   | 2.4               | 2.135   | 0.0829           |
| dcGTX3 (fM)          |                        |                   |         |                  |
| C-I                  | 0.69                   | 0.174             | 3.97    | <b>0.0002</b>    |
| C-IV                 | 0.63                   | 0.174             | 3.66    | <b>0.0007</b>    |
| I-IV                 | -0.05                  | 0.174             | -0.30   | 0.9502           |
| Beginning – Peak     | -0.10                  | 0.174             | -0.60   | 0.8221           |
| Beginning – Recovery | 0.58                   | 0.174             | 3.32    | <b>0.0026</b>    |
| Peak - Recovery      | 0.68                   | 0.174             | 3.92    | <b>0.0003</b>    |
| dcSTX (fM)           |                        |                   |         |                  |

|                      |        |       |       |                  |
|----------------------|--------|-------|-------|------------------|
| C-I                  | 0.449  | 0.124 | 3.62  | <b>0.0008</b>    |
| C-IV                 | 0.270  | 0.124 | 2.18  | 0.0737           |
| I-IV                 | -0.178 | 0.124 | -1.44 | 0.3203           |
| Beginning – Peak     | 0.389  | 0.124 | 3.15  | <b>0.0047</b>    |
| Beginning – Recovery | 0.668  | 0.124 | 5.40  | <b>&lt;.0001</b> |
| Peak - Recovery      | 0.279  | 0.124 | 2.26  | 0.0624           |
| dcSTX (MF)           |        |       |       |                  |
| Beginning – Peak     | -3.04  | 0.587 | -5.18 | <b>&lt;.0001</b> |
| Beginning – Recovery | -1.18  | 0.587 | -2.01 | 0.1095           |
| Peak - Recovery      | 1.86   | 0.587 | 3.17  | <b>0.0044</b>    |
| C1 (fM)              |        |       |       |                  |
| C-I                  | 2.38   | 0.982 | 2.42  | <b>0.0409</b>    |
| C-IV                 | 1.80   | 0.982 | 1.84  | 0.1575           |
| I-IV                 | -0.57  | 0.982 | -0.58 | 0.8285           |
| C1 (MF)              |        |       |       |                  |
| Beginning – Peak     | -3.50  | 1.77  | 2.16  | 0.1172           |
| Beginning – Recovery | 2.86   | 1.77  | -0.41 | 0.2380           |
| Peak - Recovery      | 6.36   | 1.77  | 5.02  | <b>0.0009</b>    |
| C2 (fM)              |        |       |       |                  |
| C-I                  | 2.82   | 0.95  | 2.97  | <b>0.0084</b>    |
| C-IV                 | 2.06   | 0.95  | 2.17  | 0.0763           |
| I-IV                 | -0.76  | 0.95  | -0.80 | 0.7045           |
| Beginning – Peak     | 3.90   | 0.95  | 4.11  | <b>0.0001</b>    |
| Beginning – Recovery | 4.98   | 0.95  | 5.24  | <b>&lt;.0001</b> |
| Peak - Recovery      | 1.07   | 0.95  | 1.13  | 0.4949           |
| C2 (MF)              |        |       |       |                  |
| C-I                  | 2.28   | 1.4   | 1.63  | 0.2340           |
| C-IV                 | 3.54   | 1.4   | 2.52  | <b>0.0311</b>    |
| I-IV                 | 1.26   | 1.4   | 0.90  | 0.6423           |
| Beginning – Peak     | 3.55   | 1.4   | 2.54  | <b>0.0302</b>    |
| Beginning – Recovery | 3.91   | 1.4   | 2.79  | <b>0.0146</b>    |
| Peak - Recovery      | 0.36   | 1.4   | 0.25  | 0.9653           |
| C3 (fM)              |        |       |       |                  |
| Beginning – Peak     | 0.078  | 0.658 | -1.98 | 0.0783           |
| Beginning – Recovery | 0.021  | 0.658 | 1.62  | <b>0.0213</b>    |
| Peak - Recovery      | 0.500  | 0.658 | 3.60  | 0.8713           |
| C4 (fM)              |        |       |       |                  |
| C-I                  | 7.52   | 2.25  | 3.35  | <b>0.0023</b>    |
| C-IV                 | 5.65   | 2.25  | 2.52  | <b>0.0319</b>    |
| I-IV                 | -1.87  | 2.25  | -0.83 | 0.6818           |
| Beginning – Peak     | 11.36  | 2.25  | 5.06  | <b>&lt;.0001</b> |
| Beginning – Recovery | 13.19  | 2.25  | 5.87  | <b>&lt;.0001</b> |
| Peak - Recovery      | 1.83   | 2.25  | 0.82  | 0.6940           |
| C4 (MF)              |        |       |       |                  |
| Beginning – Peak     | 8.26   | 2.62  | 3.15  | <b>0.0046</b>    |
| Beginning – Recovery | -2.34  | 2.62  | -0.89 | 0.6447           |

|                 |        |      |       |               |
|-----------------|--------|------|-------|---------------|
| Peak - Recovery | -10.60 | 2.62 | -4.04 | <b>0.0002</b> |
|-----------------|--------|------|-------|---------------|

P-values < 0.05 are represented in bold.

**Supplemental Table S2.** MRM transitions used for PST analogues.

| PST analog | Ion mode | MRM transitions               |
|------------|----------|-------------------------------|
| C1, 2      | ESI-     | 474 → 431; 394; 351           |
| C3, 4      | ESI-     | 490 → 410; 392                |
| dcGTX2, 3  | ESI-     | 351 → 333; 293                |
| GTX2, 3    | ESI-     | 394 → 376; 351; 333; 300      |
| GTX1, 4    | ESI-     | 410 → 367; 349                |
| GTX5       | ESI-     | 378 → 360; 318; 306; 301; 122 |
| GTX6       | ESI-     | 394 → 376; 351; 333; 300      |
| dcSTX      | ESI+     | 257 → 239; 197; 126           |
| dcNEO      | ESI+     | 273 → 255; 241; 213           |
| STX        | ESI+     | 300 → 282; 266; 221; 216; 204 |
| NEO        | ESI+     | 316 → 298; 273                |

**Supplemental Table S3.** LOD and LOQ obtained in the present study.

|          | nmol L <sup>-1</sup> |       |
|----------|----------------------|-------|
| Compound | LOD                  | LOQ   |
| dcGTX2   | 0,329                | 1,097 |
| dcGTX3   | 0,045                | 0,149 |
| GTX5     | 0,444                | 1,479 |
| GTX2     | 0,147                | 0,491 |

|       |       |       |
|-------|-------|-------|
| GTX3  | 0,657 | 2,189 |
| GTX6  | 0,023 | 0,076 |
| GTX1  | 0,028 | 0,093 |
| GTX4  | 0,366 | 1,22  |
| C3    | 0,381 | 1,271 |
| C4    | 0,361 | 1,203 |
| C1    | 0,083 | 0,276 |
| C2    | 0,064 | 0,212 |
| dcSTX | 0,144 | 0,48  |
| dcNEO | 0,193 | 0,642 |
| STX   | 0,003 | 0,01  |
| NEO   | 0,007 | 0,022 |

**Supplemental Figure S1.** Correlation plots between a) all cell parameters and b) PSTs produced by *Gymnodinium catenatum* under control conditions and marine heatwave categories I and IV.

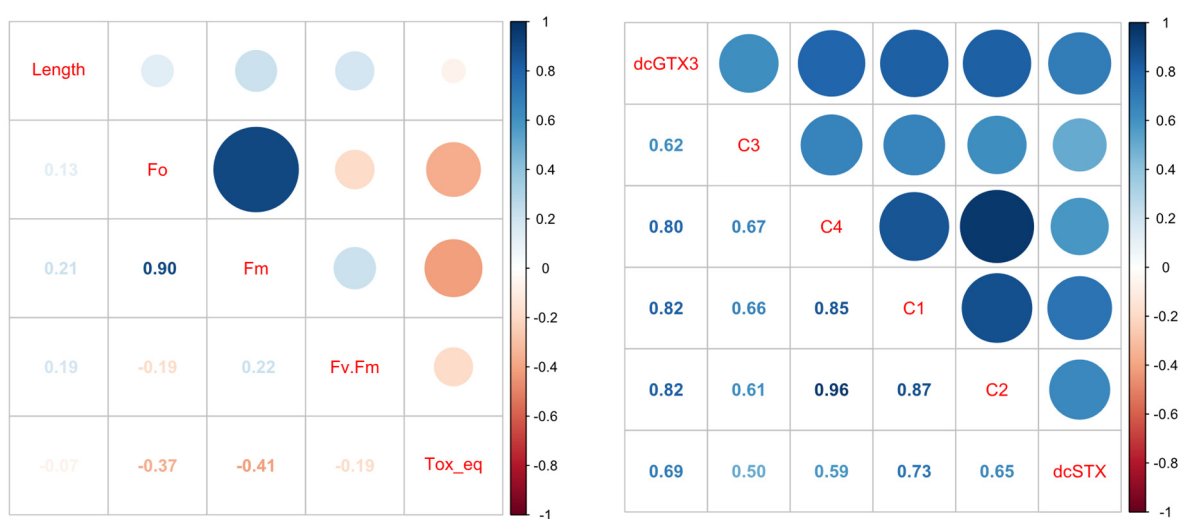

Supplement: s1 [file s1]
